# Supplementary material for: Cyclooxygenase-2 (COX-2) Expression in Equine Melanocytic Tumors
Source: MDPI journal article supplement (doi:10.3390/vetsci11020077), 2024-02-07
Supplement: s1 [file s1]

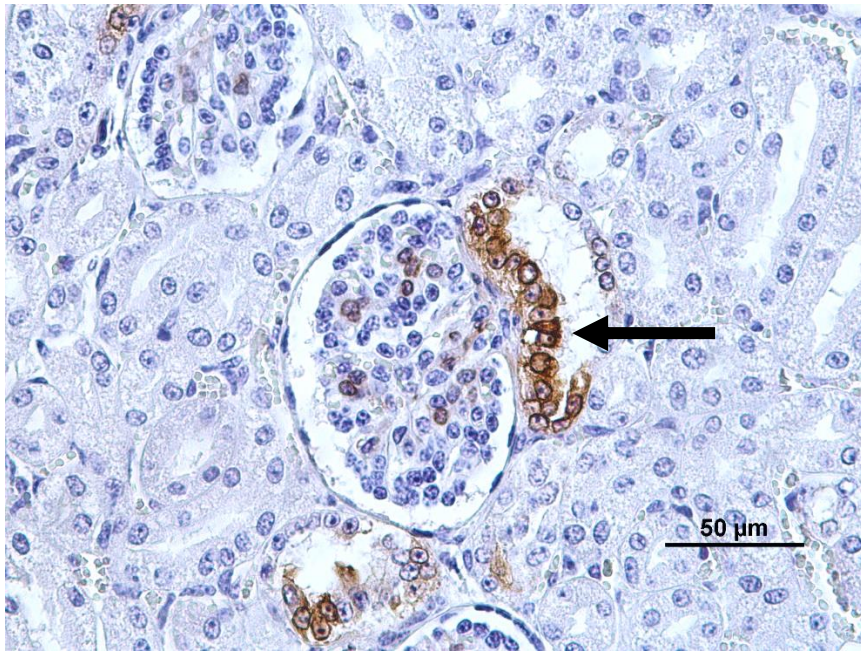

**Figure S1:** Positive control (equine kidney). Note COX-2 immunolabeling (brown staining) in the cells of *macula densa* (black arrow).
